# Supplementary material
Source: Research Square preprint supplement (doi:10.21203/rs.3.rs-9111535/v1)
Supplement: Supplementary file 1 [file 057aacb8e8a994ecca8aeb7d.docx]

# Data Collection Form: Neglected Clubfoot Study

## 1. Study Identification

Study ID: A/…
Date of data collection: … / … / ….
Investigator name:
Institution / Hospital:
Contact (Phone / Email):

## 2. Patient Demographics

Patient initials or ID:
Sex: ☐ Male ☐ Female
Date of birth:
Place of birth:
Parent/guardian contact (at least two phone numbers):
Email:
Address:

## 3. Clinical Characteristics

Family history of clubfoot: ☐ Yes ☐ No
If yes, specify: ☐ Father ☐ Mother ☐ Maternal uncle ☐ Paternal uncle ☐ Maternal aunt ☐ Paternal aunt ☐ Cousin ☐ Nephew/Niece

Age at first diagnosis (months):

Associated conditions:
☐ Hip pathology
☐ Arthrogryposis
☐ Spina bifida
☐ Cerebral palsy
☐ Other:

First diagnosing center:
Diagnosed by:
☐ Midwife ☐ General practitioner ☐ Nurse ☐ Surgeon ☐ Pediatrician ☐ Physiotherapist ☐ Other:

Severity at first diagnosis:
Pirani score:

Distance to treatment center (km):
Estimated transport cost (USD):

## 4. First Treatment

Treatment center:
Date of first treatment:
Age at first treatment (months):

Reason for delayed treatment:
☐ Financial barrier
☐ Logistical barrier
☐ Sociocultural beliefs
☐ Lack of awareness

Treatment modality:
Physiotherapy: ☐ Yes ☐ No Duration:
Orthotic treatment: ☐ Yes ☐ No Duration:
Casting: ☐ Yes ☐ No
☐ Ponseti method
☐ Traditional method

Number of casts:
Percutaneous tenotomy: ☐ Yes ☐ No

Performed by:
☐ Orthopedic surgeon ☐ General surgeon ☐ General practitioner ☐ Nurse ☐ Physiotherapist

Type of anesthesia:
☐ Local
☐ General (ketamine)
☐ General (other):

Bracing: ☐ Yes ☐ No Duration:
Foot abduction brace: ☐ Yes ☐ No

Surgical treatment: ☐ Yes ☐ No

Outcome:
☐ Very satisfactory ☐ Satisfactory ☐ Unsatisfactory

## 5. Second Treatment (if applicable)

Treatment center:
Reason for second treatment:

Distance to center (km):
Transport cost (USD):

Treatment modality:
Physiotherapy: ☐ Yes ☐ No — Duration:
Orthotic treatment: ☐ Yes ☐ No — Duration:
Casting: ☐ Yes ☐ No
☐ Ponseti method
☐ Traditional method

Number of casts:
Percutaneous tenotomy: ☐ Yes ☐ No

Bracing: ☐ Yes ☐ No — Duration:
Foot abduction brace: ☐ Yes ☐ No

Surgical treatment:
☐ Yes ☐ No
☐ Open surgery

Age at second treatment (months):

Outcome:
☐ Very satisfactory ☐ Satisfactory ☐ Unsatisfactory

Performed by:
☐ Orthopedic surgeon ☐ General surgeon ☐ General practitioner ☐ Nurse

☐ Physiotherapist

## 6. Parental Data

Occupation:

Prior knowledge of clubfoot: ☐ Yes ☐ No
If yes, source:
☐ Media ☐ Church ☐ School ☐ Healthcare personnel ☐ Other:

First informant of diagnosis:
☐ Midwife ☐ Physician ☐ Pediatrician ☐ Surgeon ☐ Physiotherapist ☐ Other:

Quality of communication:
☐ Very good ☐ Good ☐ Average ☐ Poor ☐ Very poor

Perception of condition:
☐ Normal ☐ Negative

Beliefs about etiology:
☐ Normal condition
☐ Mystical origin (curse, witchcraft)
☐ Religious origin
☐ Familial condition

Beliefs about treatment:
☐ Modern treatment
☐ Traditional treatment
☐ Religious treatment
☐ No treatment (wait and see)
